# Supplementary material for: Molecular Sexing and Species Detection of Antlered European Hunting Game for Forensic Purposes
Source: MDPI journal article supplement (doi:10.3390/ani12030246), 2022-01-20
Supplement: s1 [file s1]

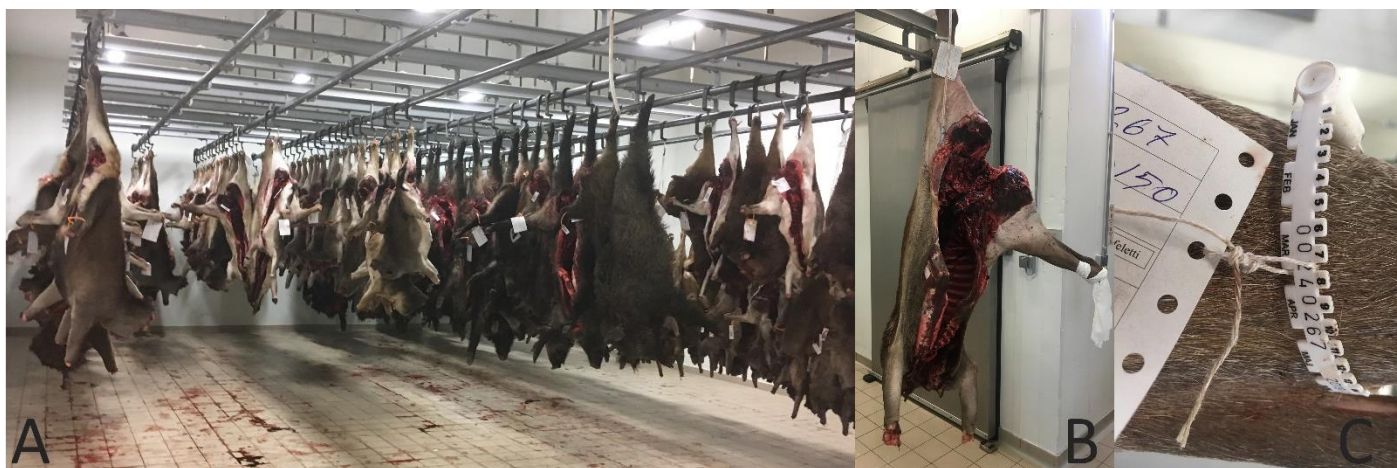

**Figure S1.** (A) Eviscerated and decapitated carcasses in processing house cold store. (B) Eviscerated and decapitated carcass of red deer, which was deliberately registered falsely as female. (C) Official tab of registered harvest

**Table S1.** Sample database from three antlered species (altogether n=115) used for validation studies, collected between 2019-2021 from different parts of Hungary [Pest County west (PesW); Pest County east (PesE); Békés County (Bek); Csongrád County (Cso), Hajdú-Bihar County (Haj), Tolna County (Tol), Fejér County (Fej), Veszprém County (Ves)]. Ce: red deer, Dd: fallow deer, Cc: roe deer

| Sample code | Tissue type | Sex    | Sample code | Tissue type | Sex    | Sample code | Tissue type | Sex    |
|-------------|-------------|--------|-------------|-------------|--------|-------------|-------------|--------|
| Ce_Haj_1    | hair        | male   | Dd_PesW_1   | muscle      | female | Cc_PesW_1   | muscle      | male   |
| Ce_Ves_2    | muscle      | male   | Dd_PesW_2   | muscle      | female | Cc_PesW_2   | muscle      | male   |
| Ce_Ves_3    | muscle      | male   | Dd_PesW_3   | muscle      | female | Cc_PesW_3   | muscle      | male   |
| Ce_Ves_4    | muscle      | male   | Dd_PesW_4   | muscle      | male   | Cc_PesW_4   | muscle      | female |
| Ce_Ves_5    | muscle      | male   | Dd_PesW_5   | muscle      | male   | Cc_PesW_5   | muscle      | female |
| Ce_Ves_6    | muscle      | male   | Dd_PesW_6   | muscle      | male   | Cc_PesW_6   | muscle      | male   |
| Ce_Ves_7    | muscle      | male   | Dd_PesW_7   | muscle      | male   | Cc_PesW_7   | muscle      | male   |
| Ce_PesW_8   | muscle      | female | Dd_PesW_8   | muscle      | male   | Cc_PesW_8   | muscle      | male   |
| Ce_PesW_9   | muscle      | male   | Dd_PesW_9   | muscle      | male   | Cc_PesW_9   | muscle      | male   |
| Ce_PesW_10  | muscle      | male   | Dd_PesW_10  | muscle      | male   | Cc_Cso_10   | muscle      | female |
| Ce_Zal_11   | muscle      | female | Dd_PesW_11  | muscle      | male   | Cc_PesW_11  | muscle      | male   |
| Ce_Zal_12   | muscle      | male   | Dd_PesW_12  | muscle      | female | Cc_PesW_12  | muscle      | male   |
| Ce_PesW_13  | muscle      | male   | Dd_PesW_13  | muscle      | male   | Cc_PesW_13  | muscle      | male   |
| Ce_PesW_14  | muscle      | male   | Dd_PesW_14  | muscle      | male   | Cc_PesW_14  | muscle      | male   |
| Ce_PesW_15  | muscle      | male   | Dd_PesW_15  | muscle      | male   | Cc_PesW_15  | muscle      | male   |
| Ce_PesW_16  | muscle      | male   | Dd_PesW_16  | muscle      | male   | Cc_PesW_16  | muscle      | male   |
| Ce_PesW_17  | muscle      | male   | Dd_PesW_17  | muscle      | male   | Cc_PesW_17  | muscle      | female |
| Ce_PesW_18  | muscle      | male   | Dd_PesW_18  | muscle      | male   | Cc_PesW_18  | muscle      | male   |
| Ce_PesW_19  | muscle      | male   | Dd_Fej_19   | muscle      | female | Cc_PesW_19  | muscle      | male   |
| Ce_PesW_20  | muscle      | male   | Dd_Fej_20   | muscle      | female | Cc_PesW_20  | muscle      | male   |
| Ce_PesW_21  | muscle      | male   | Dd_Fej_21   | muscle      | male   | Cc_PesW_21  | muscle      | male   |
| Ce_PesW_22  | muscle      | male   | Dd_Fej_22   | muscle      | female | Cc_PesW_22  | muscle      | male   |
| Ce_PesW_23  | muscle      | male   | Dd_Fej_23   | muscle      | female | Cc_PesW_23  | muscle      | male   |
| Ce_PesW_24  | muscle      | male   | Dd_Fej_24   | muscle      | female | Cc_PesW_24  | muscle      | male   |
| Ce_PesW_25  | muscle      | male   | Dd_PesE_25  | muscle      | female | Cc_PesW_25  | muscle      | male   |
| Ce_PesW_26  | muscle      | male   | Dd_PesE_26  | muscle      | female | Cc_PesW_26  | muscle      | male   |
| Ce_PesW_27  | hair        | male   | Dd_PesE_27  | muscle      | male   | Cc_PesW_27  | muscle      | male   |
| Ce_Som_28   | muscle      | female | Dd_PesE_28  | muscle      | female | Cc_PesW_28  | muscle      | male   |
| Ce_Bar_29   | muscle      | female | Dd_PesE_29  | muscle      | male   | Cc_PesW_29  | muscle      | male   |
| Ce_PesW_30  | feces       | male   | Dd_PesE_30  | muscle      | female | Cc_PesW_30  | muscle      | male   |
|             |             |        | Dd_PesE_31  | muscle      | female | Cc_PesW_31  | muscle      | male   |
|             |             |        | Dd_PesE_32  | muscle      | female | Cc_PesW_32  | muscle      | male   |

|            |        |        |            |        |        |
|------------|--------|--------|------------|--------|--------|
| Dd_PesE_33 | muscle | female | Cc_PesW_33 | muscle | male   |
| Dd_PesE_34 | muscle | female | Cc_PesW_34 | feces  | female |
| Dd_PesW_35 | muscle | female | Cc_PesW_35 | muscle | male   |
| Dd_PesW_36 | muscle | female | Cc_PesW_36 | feces  | male   |
| Dd_PesW_37 | muscle | female | Cc_Haj_37  | muscle | female |
| Dd_PesW_38 | muscle | male   | Cc_PesW_38 | feces  | female |
| Dd_PesW_39 | feces  | male   |            |        |        |
| Dd_Tol_40  | muscle | female |            |        |        |
| Dd_PesE_41 | muscle | male   |            |        |        |
| Dd_PesE_42 | muscle | female |            |        |        |
| Dd_PesE_43 | muscle | female |            |        |        |
| Dd_PesE_44 | feces  | male   |            |        |        |
| Dd_PesE_45 | muscle | female |            |        |        |
| Dd_PesE_46 | muscle | female |            |        |        |
| Dd_PesE_47 | feces  | female |            |        |        |

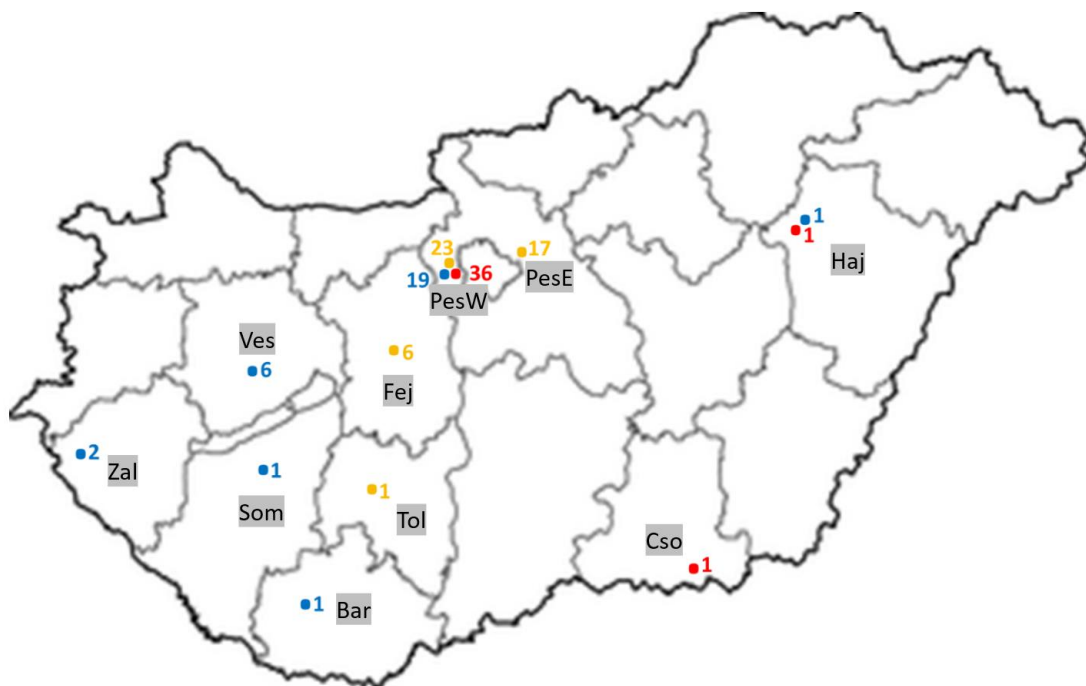

**Figure S2.** Distribution of collected samples within Hungary from three antlered species (altogether n=115) used for validation studies. Blue: red deer (n=30), yellow: fallow deer (n=47), red: roe deer (n=38)

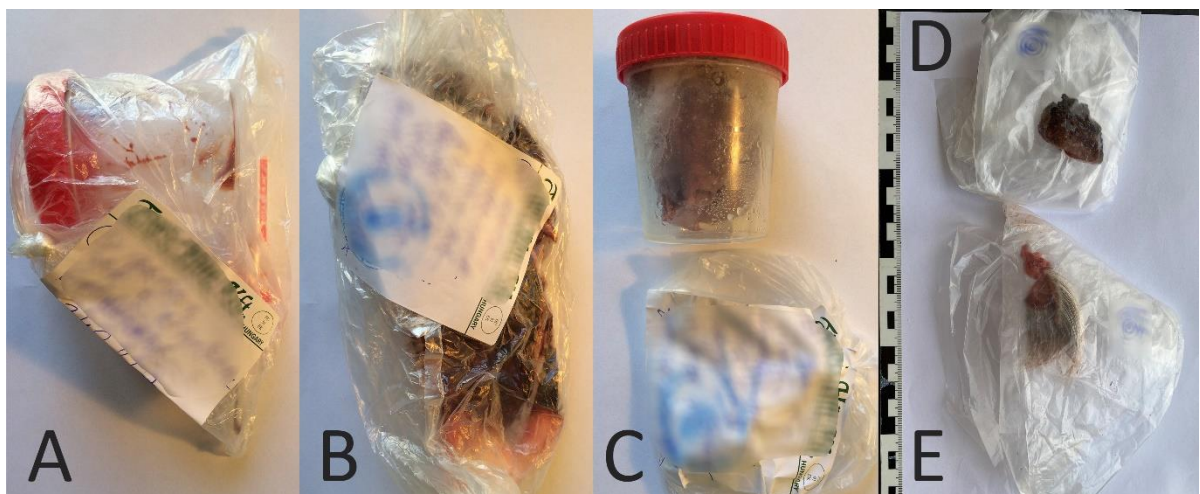

**Figure S3.** Field sample types. (A) blood and vessel, (B) bone / rib, (C) muscle, (D) muscle, (E) corium with hairs

**Table S2.** In silico intra-species variation study of developed primers, using different number of sequences downloaded from NCBI GenBank. Ce: red deer, Dd: fallow deer, Cc: roe deer. <sup>a-m</sup>: accession numbers and information about the downloaded sequences

| Primer name (length of alignment in basepairs) | Number of sequences obtained from GenBank |                |                  | Number of polymorphic sites |    |    | Max. number of polymorphic sites within a single sequence |    |    |
|------------------------------------------------|-------------------------------------------|----------------|------------------|-----------------------------|----|----|-----------------------------------------------------------|----|----|
|                                                | Ce                                        | Dd             | Cc               | Ce                          | Dd | Cc | Ce                                                        | Dd | Cc |
| AmelX/Y F (18)                                 | 3 <sup>a</sup>                            | 2 <sup>b</sup> | 2 <sup>c</sup>   | 0                           | 0  | 0  | 0                                                         | 0  | 0  |
| AmelX/Y R (18)                                 | 6 <sup>d</sup>                            | 2 <sup>b</sup> | 2 <sup>c</sup>   | 0                           | 0  | 1  | 0                                                         | 0  | 1  |
| SRY F (20)                                     | 22 <sup>e</sup>                           | 1 <sup>f</sup> | 5 <sup>g</sup>   | 0                           | 0  | 0  | 0                                                         | 0  | 0  |
| SRY R (20)                                     | 22 <sup>e</sup>                           | 1 <sup>f</sup> | 5 <sup>g</sup>   | 0                           | 0  | 0  | 0                                                         | 0  | 0  |
| Cytb Ce F (31)                                 | 435 <sup>h</sup>                          | -              | -                | 9                           | -  | -  | 4                                                         | -  | -  |
| Cytb Dd F (25)                                 | -                                         | 4 <sup>i</sup> | -                | -                           | 0  | -  | -                                                         | 0  | -  |
| Cytb Cc F (36)                                 | -                                         | -              | 135 <sup>j</sup> | -                           | -  | 3  | -                                                         | -  | 3  |
| Cytb R (26)                                    | 266 <sup>k</sup>                          | 5 <sup>l</sup> | 135 <sup>j</sup> | 2                           | 1  | 2  | 2                                                         | 1  | 2  |

<sup>a</sup>: FJ946989, KJ542362, KJ542367; <sup>b</sup>: KJ542361, KJ542366; <sup>c</sup>: KJ542360, KJ542365; <sup>d</sup>: AY453391, FJ946989, FJ946990, KJ542362, KJ542367, XM043895580; <sup>e</sup>: DQ888682-96, EF062527-28, EF100133-35, EF693906-07; <sup>f</sup>: DQ888701; <sup>g</sup>: DQ888700, HG326979, KJ558344-46; <sup>h</sup>: all available cytb sequences from *Cervus elaphus* (taxid:9860) accessed on: 20.12.2021. containing Cytb Ce F primer binding region; <sup>i</sup>: AJ000022, JN632629, NC020700, MN746794; <sup>j</sup>: KJ558288-333, KJ681491, KT964391, KT964393-94, KT964396-402, KT964404-09, KT964411-12, KT964414, KT964419-27, KT964431-42, KU845311, MT297579-624, Y14951; <sup>k</sup>: all available cytb sequences from *Cervus elaphus* (taxid:9860) accessed on: 20.12.2021. containing Cytb Ce R primer binding region; <sup>l</sup>: AJ000022, JN632629, KM224369, NC020700, MN746794;

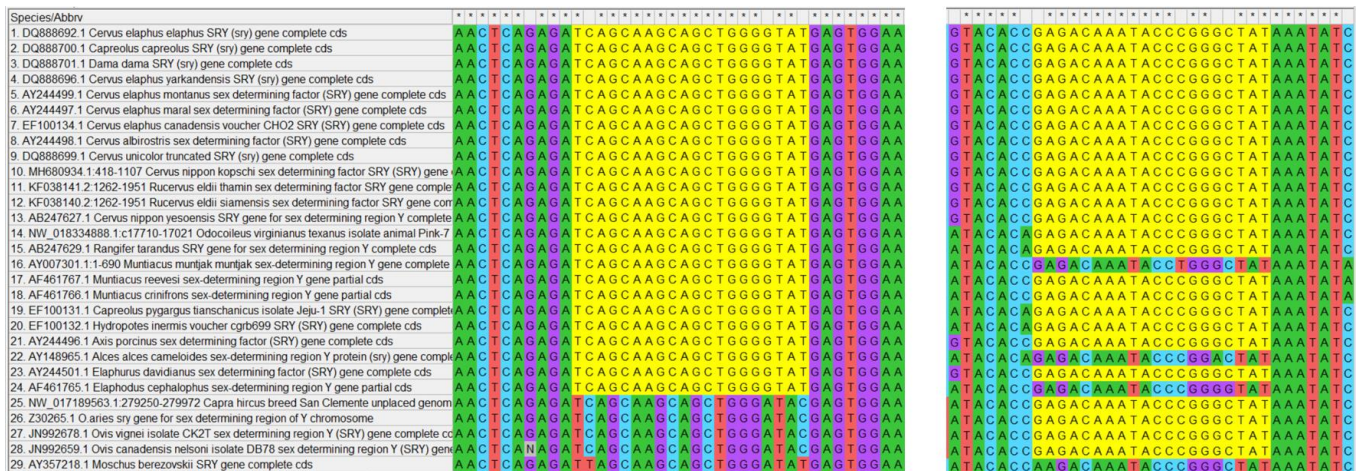

**Figure S4.** The forward (left side) and reverse (right side) primer binding regions marked out with yellow color within the highly conservative regions of the SRY gene identified among species by MEGA.

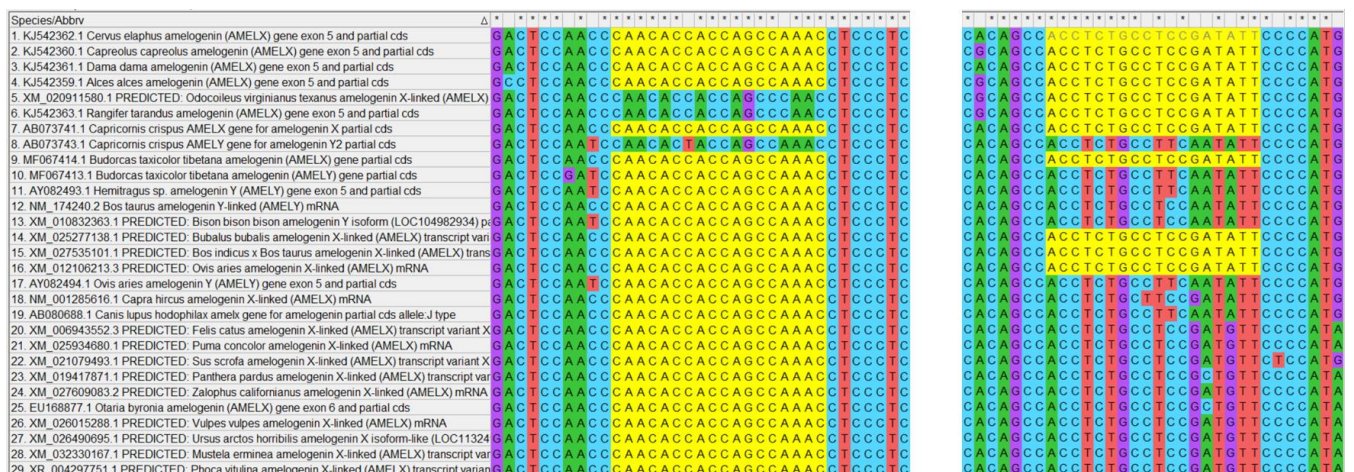

**Figure S5.** The forward (left side) and reverse (right side) primer binding regions marked out with yellow color within the highly conservative regions of the AmelogeninX/Y gene among species identified by MEGA.

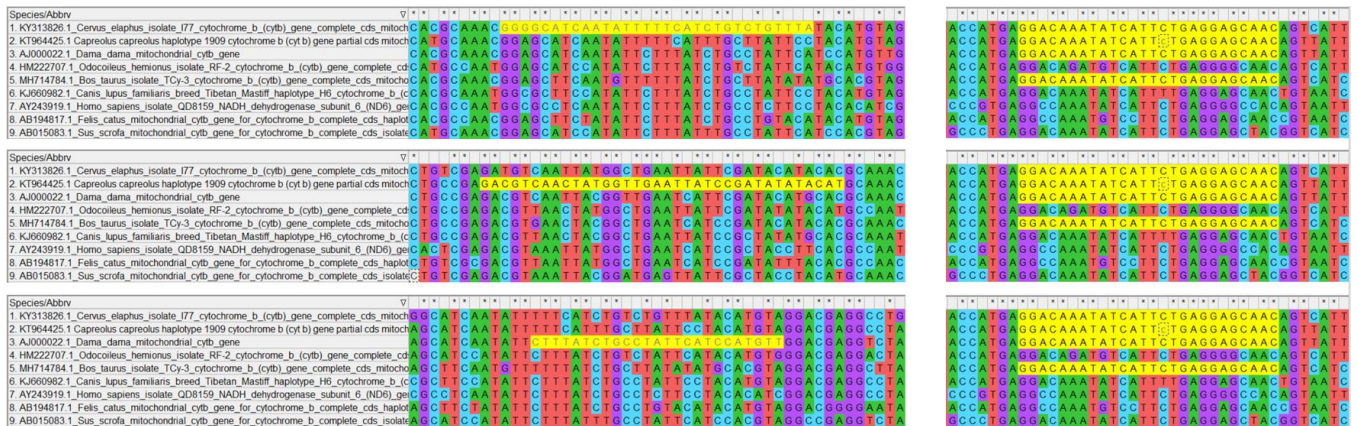

**Figure S6.** The species-specific forward (left side) and the universal reverse (right side) primer binding regions marked out with yellow color within the cytochrome b gene among species identified by MEGA.

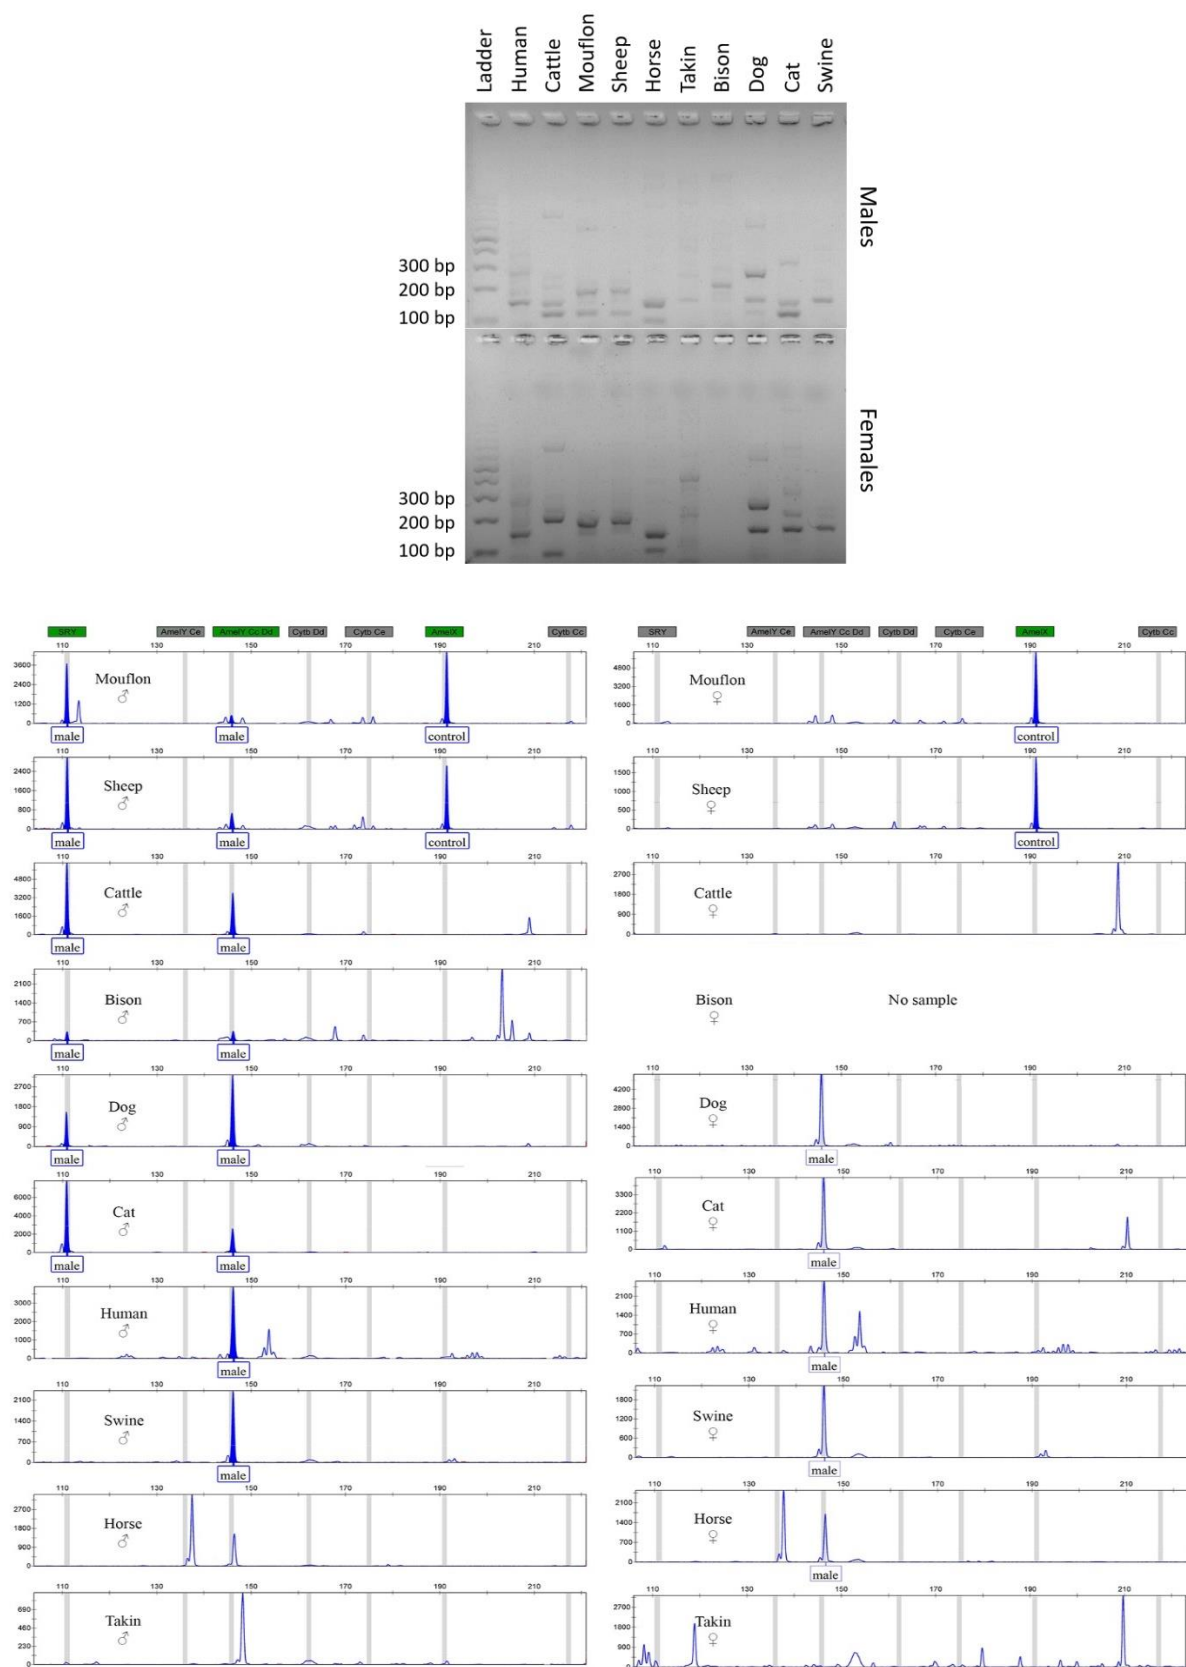

**Figure S7.** Species specificity tested on male and female samples using the *DeerSex-plex* assay, detected on agarose gel (at the top) and by capillary electrophoresis (below).

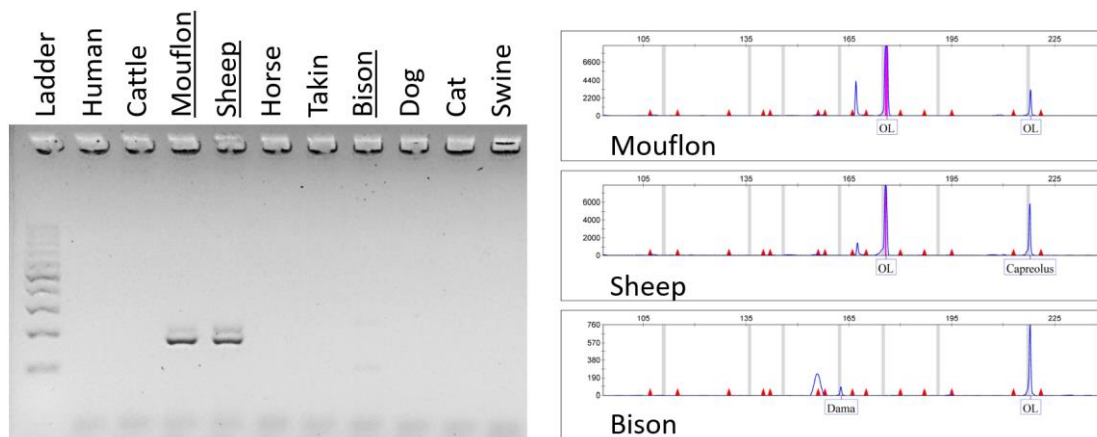

**Figure S8.** Species specificity tested on female samples using the *DeerSpec-plex* assay, detected by agarose gel and capillary electrophoresis.

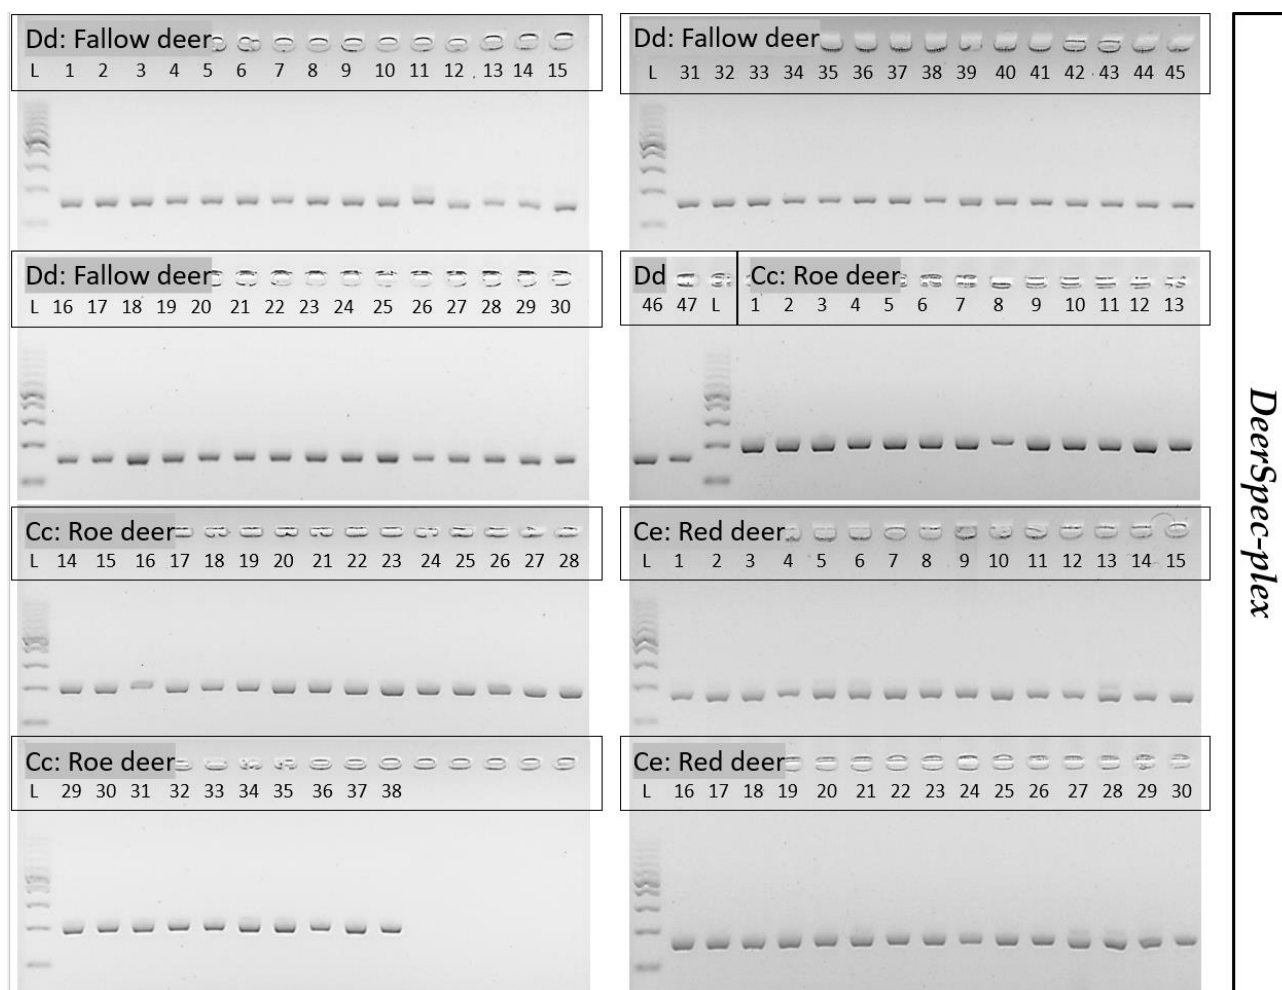

**Figure S9.** Intra-species specificity study: population samples from three species amplified with *DeerSpec-plex* and detected on agarose gel

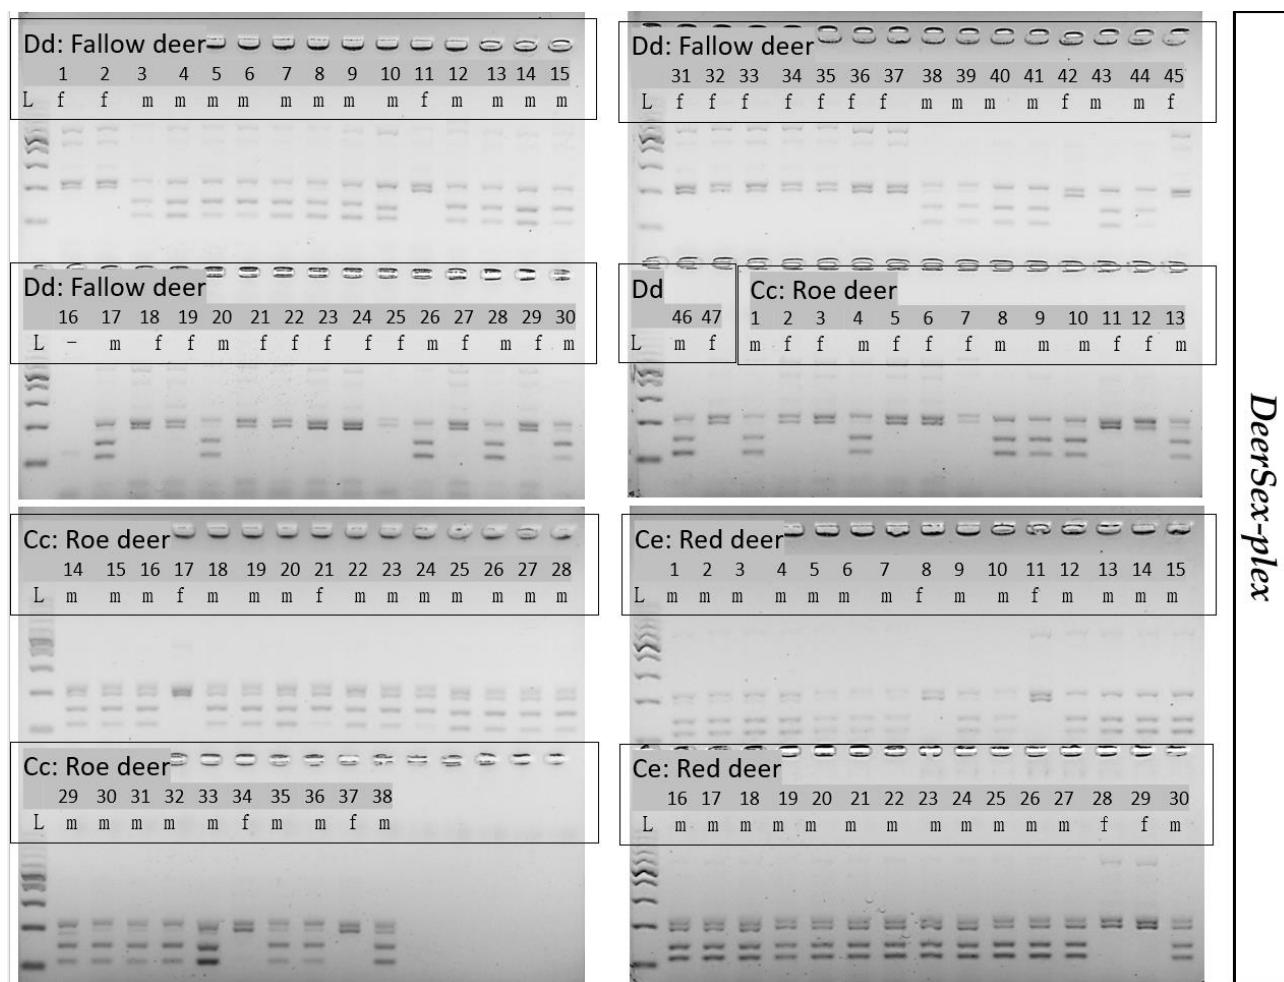

**Figure S10.** Intra-species specificity study: population samples (n=115) from three species amplified with *DeerSex-plex* and detected on agarose gel. m: male, f: female

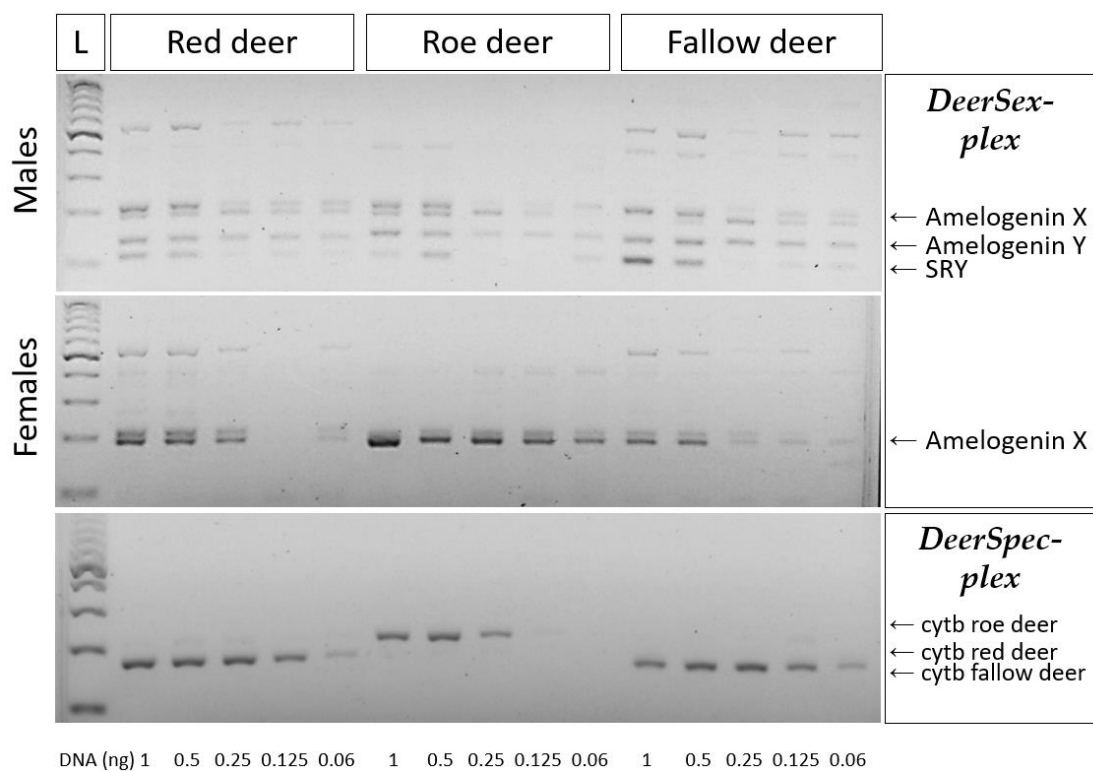

**Figure S11.** Sensitivity tested on male and female samples using the *DeerSex-plex* and *DeerSpec-plex* assays on agarose gel.

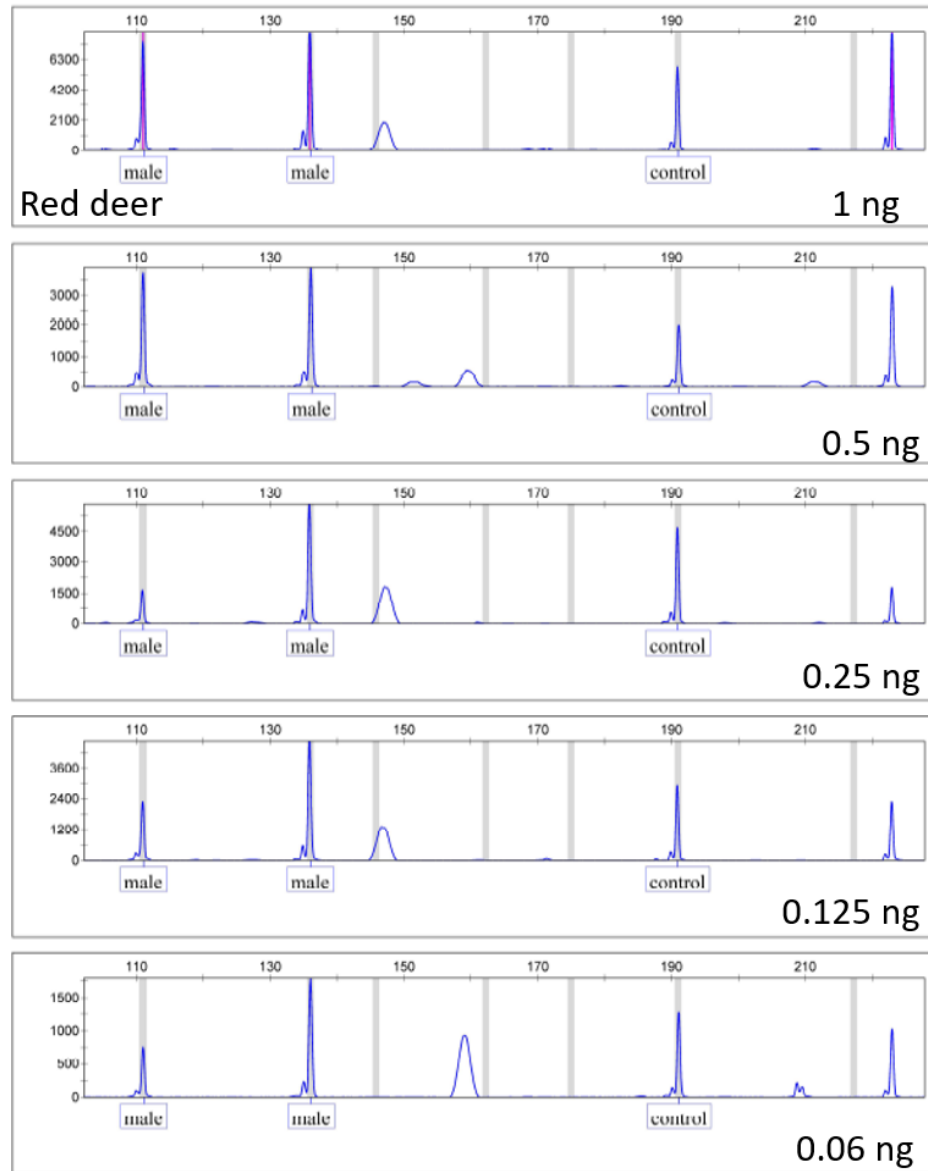

**Figure S12a.** The SRY and AMELX/Y loci in red deer samples amplified with varying amounts of input DNA with the DeerSex-plex assay. A dilution of the red deer DNA was performed, and 1.0, 0.5, 0.25, 0.125 or 0.06 ng of DNA (from the top down, respectively) were used in the amplification reaction.

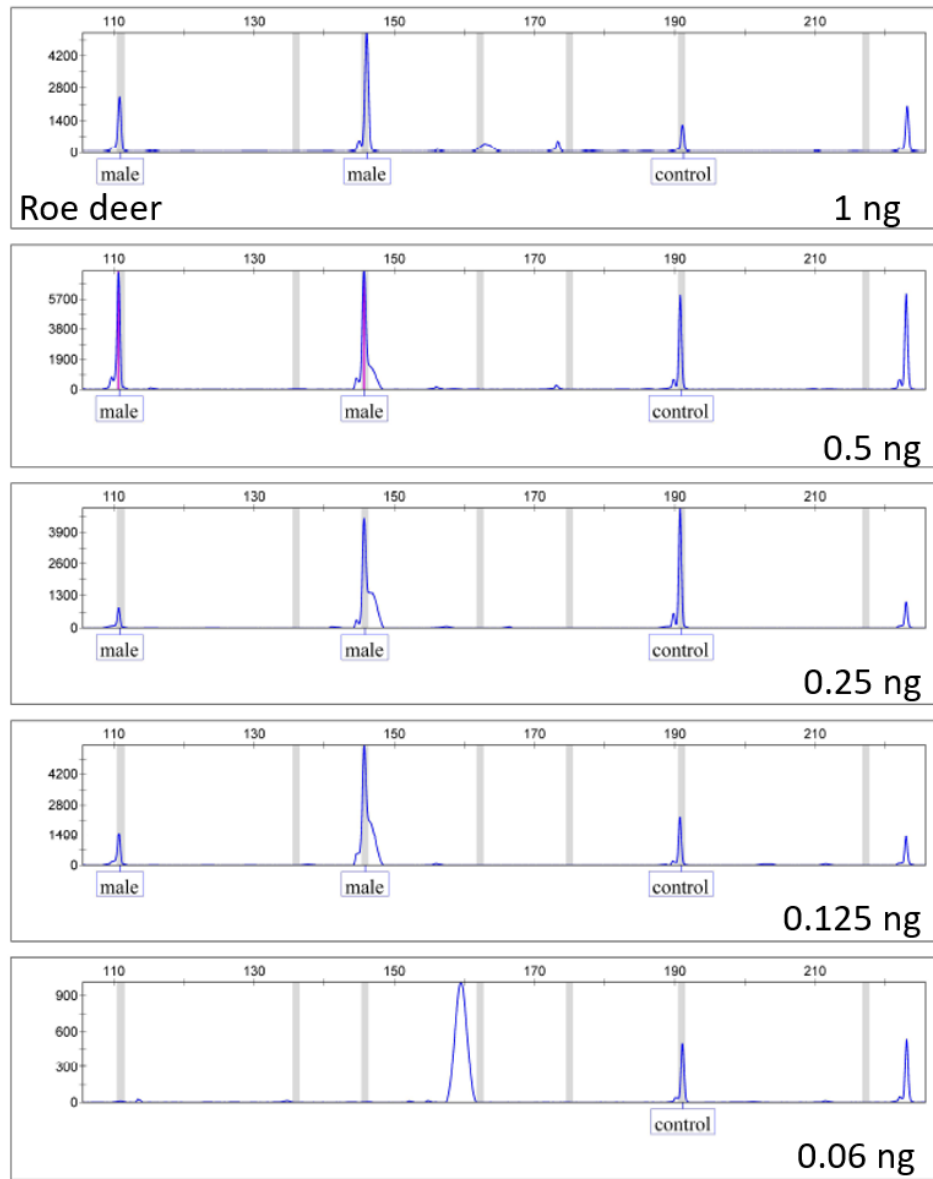

**Figure S12b.** The SRY and AMELX/Y loci in roe deer samples amplified with varying amounts of input DNA with the *DeerSex-plex* assay. A dilution of the roe deer DNA was performed, and 1.0, 0.5, 0.25, 0.125 or 0.06 ng of DNA (from the top down, respectively) were used in the amplification reaction. Allele drop-outs can be observed under 0.5 ng input DNA.

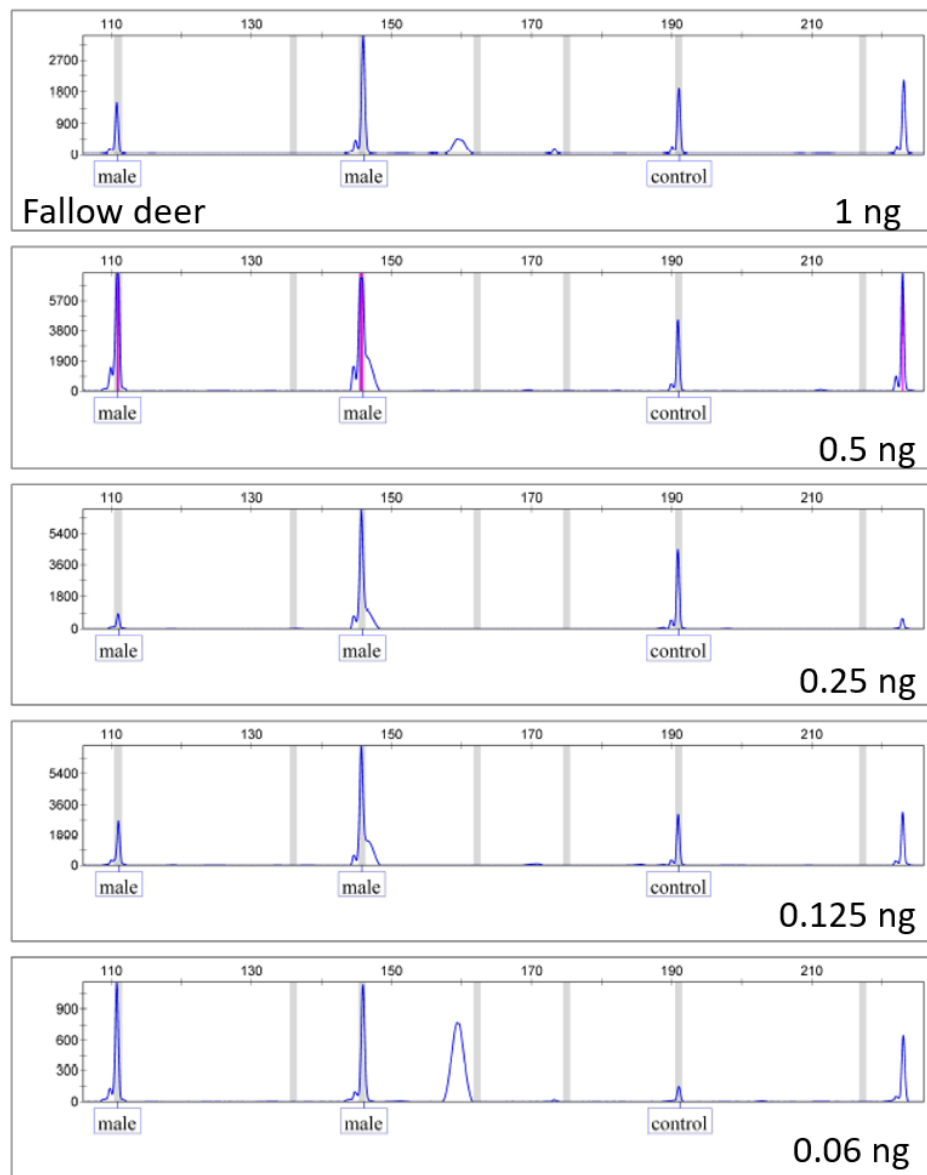

**Figure S12c.** The SRY and AMELX/Y loci in fallow deer samples amplified with varying amounts of input DNA with the *DeerSex-plex* assay. A dilution of the fallow deer DNA was performed, and 1.0, 0.5, 0.25, 0.125 or 0.06 ng of DNA (from the top down, respectively) were used in the amplification reaction.

|                 |   |     |      |   |     |      |   |     |      |
|-----------------|---|-----|------|---|-----|------|---|-----|------|
| Female DNA (ng) | 5 | 5   | 5    | 5 | 5   | 5    | 5 | 5   | 5    |
| Male DNA (ng)   | 1 | 0.5 | 0.33 | 1 | 0.5 | 0.33 | 1 | 0.5 | 0.33 |

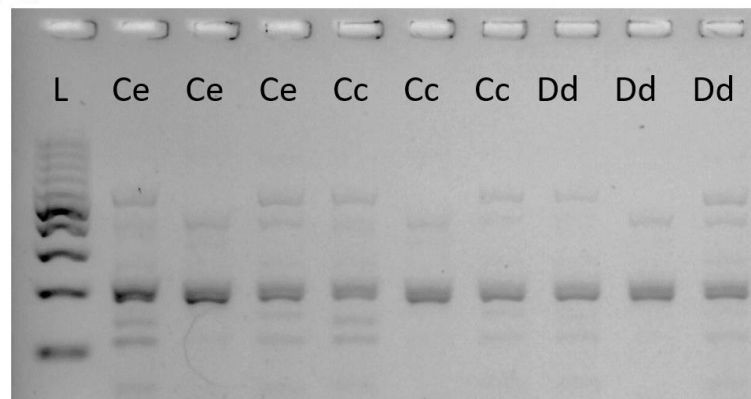

**Figure S13.** Mixture study: red deer (Ce), roe deer (Cc) and fallow deer (Dd) samples amplified with varying amounts of input male DNA with the *DeerSex-plex* assay.

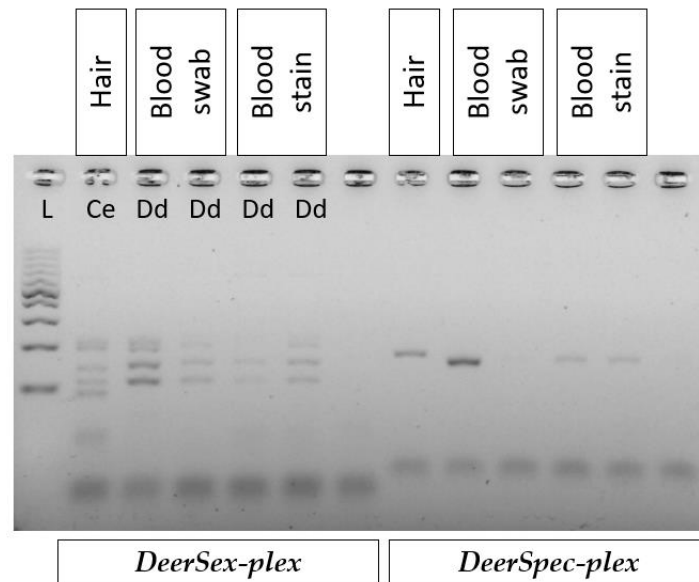

**Figure S14.** Case type samples amplified with both assays. Ce: red deer, Dd: fallow deer

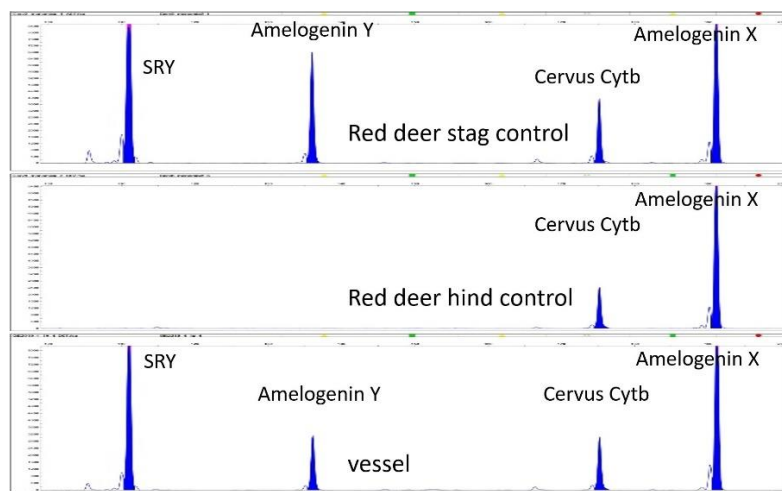

**Figure S15.** CE result of field sample (vessel) in mock case\_1.

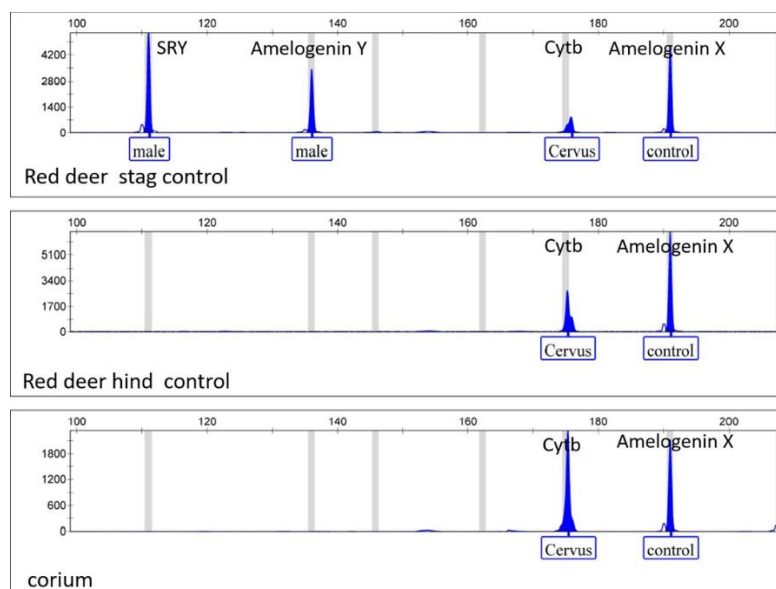

**Figure S16.** CE result of field sample (corium) in mock case\_2.
